# Supplementary material for: Assessment of a panel of tumor markers for the differential diagnosis of benign and malignant effusions by well-based reverse phase protein array
Source: PubMed Central journal article supplement (PMC4447024; doi:10.1186/s13000-015-0290-4), 2015-05-29
Supplement: 13000_2015_290_MOESM1_ESM.pdf [file 13000_2015_290_MOESM1_ESM.pdf]

**Supplemental Table 1 Etiology of the effusions (n=114)**

| Etiology                              | Number of cases    |                                 |                  |
|---------------------------------------|--------------------|---------------------------------|------------------|
|                                       | Ascites<br>No. (%) | Pleural<br>effusions<br>No. (%) | Total<br>No. (%) |
| <b>Malignant</b>                      | 15 (13.2)          | 31 (27.2)                       | 46 (40.4)        |
| Breast                                | 0                  | 3                               | 3                |
| Bronchus                              | 0                  | 3                               | 3                |
| Uterine cervix                        | 1                  | 0                               | 1                |
| Colon                                 | 1                  | 1                               | 2                |
| Mesothelioma                          | 0                  | 1                               | 1                |
| NHL                                   | 1                  | 0                               | 1                |
| NSCLC                                 | 0                  | 13                              | 13               |
| Ovary                                 | 10                 | 4                               | 14               |
| Prostate                              | 0                  | 2                               | 2                |
| Small cell lung cancer                | 0                  | 3                               | 3                |
| Uterine corpus                        | 0                  | 1                               | 1                |
| Unclear primary                       | 2                  | 0                               | 2                |
| <b>Probable malignant<sup>a</sup></b> | 12 (31.6)          | 20 (17.5)                       | 32 (28.1)        |
| Breast                                | 0                  | 3                               | 3                |
| Bronchus                              | 0                  | 2                               | 2                |
| Colon                                 | 8                  | 4                               | 12               |
| Esophagus                             | 0                  | 1                               | 1                |
| Mesothelioma                          | 0                  | 3                               | 3                |
| NSCLC                                 | 0                  | 6                               | 6                |
| Ovary                                 | 1                  | 0                               | 1                |
| Pancreas                              | 1                  | 0                               | 1                |
| Rectus                                | 0                  | 1                               | 1                |
| Uterine corpus                        | 2                  | 0                               | 2                |
| <b>Benign</b>                         | 11 (28.9)          | 25 (21.9)                       | 36 (31.6)        |
| Heart insufficiency                   | 0                  | 10                              | 10               |
| Liver cirrhosis                       | 11                 | 5                               | 16               |
| Pneumonia                             | 0                  | 7                               | 7                |
| Septic fever                          | 0                  | 3                               | 3                |
| <b>Total</b>                          | 38 (33.4)          | 76 (66.6)                       | 114 (100)        |

<sup>a</sup> No malignant effusion but history of malignancy
